# Supplementary material for: Environmental and Economic Viability of Chitosan Production in Guayas-Ecuador: A Robust Investment and Life Cycle Analysis
Source: PubMed Central journal article supplement — ACS Omega. 2021 Sep 2;6(36):23038–51. doi: 10.1021/acsomega.1c01672 (PMC8444200; doi:10.1021/acsomega.1c01672), 2021-09-02
Supplement: ao1c01672_si_001.pdf [file ao1c01672_si_001.pdf]

# The Environmental and economic viability of chitosan production in Guayas-Ecuador: A robust investment and life cycle analysis

*Ariel Riofrio<sup>a</sup>, Tania Alcivar<sup>a</sup>, Haci Baykara<sup>b</sup> \**

*<sup>a</sup>Chemical Engineering Department, Facultad de Ciencias Naturales y Matemáticas, Escuela Superior Politécnica del Litoral, ESPOL, Campus Gustavo Galindo Km 30.5 Vía Perimetral, Guayaquil, Ecuador*

*<sup>b</sup>Facultad de Ingeniería Mecánica y Ciencias de la Producción, Escuela Superior Politécnica del Litoral, ESPOL, Campus Gustavo Galindo Km 30.5 Vía Perimetral, Guayaquil, Ecuador*

- Ariel Riofrio<sup>a</sup>, email: [arielrio@espol.edu.ec](mailto:arielrio@espol.edu.ec)
- Tania Alcivar<sup>a</sup>, email: [tastalci@espol.edu.ec](mailto:tastalci@espol.edu.ec)
- Haci Baykara<sup>b</sup>, email: [hbaykara@espol.edu.ec](mailto:hbaykara@espol.edu.ec)

---

\* Corresponding author: H.Baykara, [hbaykara@espol.edu.ec](mailto:hbaykara@espol.edu.ec)

## Table of Contents

|                                                                                                                                    |    |
|------------------------------------------------------------------------------------------------------------------------------------|----|
| Table of Contents .....                                                                                                            | 2  |
| Shrimp farming and processing .....                                                                                                | 3  |
| Process.....                                                                                                                       | 3  |
| Impact assessment results.....                                                                                                     | 6  |
| Sensitivity Analysis.....                                                                                                          | 8  |
| <br>                                                                                                                               |    |
| Table S1. Shrimp Farming (Semi-Intensive) and Processing- Inventory .....                                                          | 3  |
| Table S2. Demineralization-Wastewater Inventory.....                                                                               | 3  |
| Table S3. Deproteinization Wastewater Inventory .....                                                                              | 4  |
| Table S4. Ethanol Production Inventory .....                                                                                       | 4  |
| Table S5. Chitosan Production Inventory .....                                                                                      | 5  |
| Table S6. Chitosan Impact Assessment Results for 1 kg of Chitosan Production in Guayas-Ecuador by<br>RECIPE Midpoint H Method..... | 6  |
| Table S7. Chitosan Production Scenarios' Comparison varying NaOH concentration ( <i>wt.%</i> 30-40-50%<br>NaOH solution) .....     | 7  |
| Table S8. Normalized Sensitivity Analysis Results by Changing the Method used. ....                                                | 11 |

Figure S1. Sensitivity analysis results based-on different amounts of ethanol used.....9  
Figure S2. Sensitivity analysis results based-on different amounts of shrimp shell used.....10  
Figure S3. Sensitivity analysis results by changing LCIA method. ....13

## Inventory Analysis of The Entire Processes in Chitosan Production

- Shrimp farming and processing

**Table S1.** Shrimp Farming (Semi-Intensive) and Processing- Inventory

| Exchanges                                                                                   | Unit | Amount |
|---------------------------------------------------------------------------------------------|------|--------|
| <b>Output of products/services:</b>                                                         |      |        |
| Shrimp meat                                                                                 | ton  | 0.7    |
| Shrimp shell                                                                                | ton  | 0.3    |
| <b>Input from nature (resources)</b>                                                        |      |        |
| Water, salt, ocean                                                                          | m3   | 13     |
| Water, fresh                                                                                | m3   | 2.1    |
| <b>Input of products/services:</b>                                                          |      |        |
| Diesel, from crude oil, consumption mix, at refinery, 200 ppm sulphur EU-15 S               | kg   | 7.08   |
| Concrete block {RoW}  production   APOS, S                                                  | kg   | 1.42   |
| Sodium hypochlorite/RER                                                                     | kg   | 103    |
| PVC pipe E                                                                                  | kg   | 1.3    |
| Calcium oxide, flakes (GLO), market for   APOS, S                                           | kg   | 318    |
| Calcium carbonate, precipitated {RoW}  market for calcium carbonate, precipitated   APOS, U | kg   | 909    |
| Feed                                                                                        | kg   | 970    |
| <b>Emissions to water:</b>                                                                  |      |        |
| Phosphorus, total                                                                           | kg   | 3.5    |
| Nitrogen, total                                                                             | kg   | 38     |
| Ammonia                                                                                     | kg   | -0.19  |
| BOD5                                                                                        | kg   | 21     |
| Suspended solids                                                                            | kg   | -8.19  |

## Process

**Table S2.** Demineralization-Wastewater Inventory

| Exchanges                                                       | Unit | Amount |
|-----------------------------------------------------------------|------|--------|
| <b>Residue:</b>                                                 |      |        |
| Acid-Wastewater                                                 | kg   | 87     |
| <b>Avoided Products:</b>                                        |      |        |
| Calcium chloride {RoW}  market for calcium chloride   APOS, S   | kg   | 1.24   |
| Magnesium chloride {RoW}  market for calcium chloride   APOS, S | kg   | 1.18   |
| Sodium chloride, for chlor-alkali electrolysis, at plant/RER    | kg   | 0.39   |
| <b>Input of products/services:</b>                              |      |        |

|                                                                           |    |       |
|---------------------------------------------------------------------------|----|-------|
| Sodium bicarbonate {GLO}  market for sodium bicarbonate   APOS, S         | kg | 2.86  |
| <b>Emissions to air:</b>                                                  |    |       |
| Carbon dioxide                                                            | kg | 0.084 |
| <b>Emissions to water for treatment:</b>                                  |    |       |
| Wastewater, unpolluted {RoW}  market for wastewater, unpolluted   APOS, S | m3 | 0.085 |

**Table S3.** Deproteinization Wastewater Inventory

| Exchanges                                                                           | Unit | Amount  |
|-------------------------------------------------------------------------------------|------|---------|
| <b>Residue:</b>                                                                     |      |         |
| Basic-Wastewater                                                                    | kg   | 87.5    |
| <b>Avoided Products:</b>                                                            |      |         |
| Sodium hydroxide, without water, in 50% solution state {GLO}  market for   APOS, S  | kg   | 1.766   |
| <b>Input of products/services:</b>                                                  |      |         |
| Hydrochloric acid, without water, in 30% solution state {RoW}  market for   APOS, U | kg   | 0.03    |
| Sodium bicarbonate {GLO}  market for sodium bicarbonate   APOS, S                   | kg   | 0.07    |
| <b>Emissions to air:</b>                                                            |      |         |
| Carbon dioxide                                                                      | kg   | 1.72    |
| Ammonia                                                                             | kg   | 0.03059 |
| Dinitrogen monoxide                                                                 | kg   | 0.0014  |
| Carbon dioxide, biogenic                                                            | kg   | 0.04    |
| <b>Emissions to water for treatment:</b>                                            |      |         |
| Wastewater, unpolluted {RoW}  market for wastewater, unpolluted   APOS, S           | m3   | 0.087   |
| Sodium Hydroxide 50%, treatment                                                     | kg   | 1.766   |

**Table S4.** Ethanol Production Inventory

| Exchanges                                                                                       | Unit | Amount |
|-------------------------------------------------------------------------------------------------|------|--------|
| <b>Product:</b>                                                                                 |      |        |
| Ethanol, 85%                                                                                    | kg   | 1000   |
| <b>Avoided product:</b>                                                                         |      |        |
| Carbon Dioxide                                                                                  | m3   | 183    |
| <b>Natural resources:</b>                                                                       |      |        |
| Water, river, RoW                                                                               | m3   | 14.2   |
| <b>Input of products/services:</b>                                                              |      |        |
| Molasses                                                                                        | kg   | 4000   |
| Electricity, high voltage {BR}  cane sugar production with ethanol by-product   APOS, S         | kWh  | 12553  |
| Vapor                                                                                           | kg   | 2400   |
| Urea, as 100% CO(NH <sub>2</sub> ) <sub>2</sub> (NPK 46.6-0-0), at regional storehouse/RER Mass | kg   | 0.71   |
| <b>Emissions to air:</b>                                                                        |      |        |
| Carbon dioxide                                                                                  | kg   | 6.3    |

|                                                                           |    |       |
|---------------------------------------------------------------------------|----|-------|
| <b>Emissions to water for treatment:</b>                                  |    |       |
| Wastewater, unpolluted {RoW}  market for wastewater, unpolluted   APOS, S | m3 | 0.087 |

**Table S5.** Chitosan Production Inventory

| <b>Exchanges</b>                                                                                      | <b>Unit</b> | <b>Amount</b> |
|-------------------------------------------------------------------------------------------------------|-------------|---------------|
| <b>Product:</b>                                                                                       |             |               |
| Chitosan (Base Scenario-50% NaOH Solution)                                                            | kg          | 1             |
| <b>Avoided products:</b>                                                                              |             |               |
| Urea, as N {GLO}  market for   APOS, S                                                                | kg          | 1.22          |
| <b>Natural resources:</b>                                                                             |             |               |
| Water, process, unspecified natural origin/m3                                                         | m3          | 0.446         |
| Occupation, industrial area, in ground                                                                | m2a         | 0.088         |
| <b>Input of products/services:</b>                                                                    |             |               |
| Shrimp shell                                                                                          | kg          | 35            |
| Sodium hydroxide, without water, in 50% solution state {GLO}  market for   APOS, U                    | kg          | 11.38         |
| Natural gas, high pressure {GLO}  market group for   APOS, S                                          | m3          | 2             |
| Ethanol, 85%                                                                                          | kg          | 4.27          |
| Hydrochloric acid, without water, in 30% solution state {GLO}  tetrafluoroethane production   APOS, U | kg          | 3.1           |
| <b>Electricity/heat:</b>                                                                              |             |               |
| Electricity, medium voltage {EC}  market for electricity, medium voltage   APOS, S                    | kWh         | 0.07          |
| <b>Emissions to air:</b>                                                                              |             |               |
| Carbon dioxide                                                                                        | kg          | 2             |
| Carbon dioxide, biogenic                                                                              | kg          | -1.64         |
| <b>Emissions to water:</b>                                                                            |             |               |
| Ethanol                                                                                               | kg          | 0.085         |

- **Impact assessment results**

**Table S6.** Chitosan Impact Assessment Results for 1 kg of Chitosan Production in Guayas-Ecuador by RECIPE Midpoint H Method.

| Impact Category                         | Unit                    | Total      | Chitosan-50% | Shrimp shell | NaOH       | Natural gas | Ethanol     | HCl        | Electricity | Urea        | NaOH, treatment | AcidWasteWater-Treatment | BasicWasteWater-Treatment |
|-----------------------------------------|-------------------------|------------|--------------|--------------|------------|-------------|-------------|------------|-------------|-------------|-----------------|--------------------------|---------------------------|
| Global warming                          | kg CO <sub>2</sub> eq   | 59,2158202 | 2            | 23,1400182   | 15,7139295 | 0,83344732  | 18,5343368  | 0,37176825 | 0,02588855  | 4,14838249  | 0,14893118      | 2,01399211               | 0,58189081                |
| Stratospheric ozone depletion           | kg CFC11 eq             | 4,0323E-05 | 0            | 7,3906E-06   | 1,6881E-05 | 6,9175E-07  | 1,7232E-06  | 2,9325E-07 | 1,9918E-08  | 1,5356E-06  | 1,2076E-07      | 2,2948E-08               | 1,4715E-05                |
| Ionizing radiation                      | kBq Co-60 eq            | 2,4654238  | 0            | 0,77068576   | 1,82587602 | 0,00821412  | -0,02993441 | 0,03619998 | 0,00023064  | -0,10848097 | 0,01067817      | 0,05405167               | -0,10209716               |
| Ozone formation, Human health           | kg NO <sub>x</sub> eq   | 0,07981306 | 0            | 0,03880976   | 0,03972469 | 0,00153285  | -0,01478291 | 0,00131437 | 7,2842E-05  | -0,00594356 | 0,00029424      | 0,00525506               | 0,01353573                |
| Fine particulate matter formation       | kg PM <sub>2.5</sub> eq | 0,06073482 | 0            | 0,02778172   | 0,03613073 | 0,00097677  | -0,01068273 | 0,00093651 | 4,3996E-05  | -0,00717148 | 0,00022378      | 0,00519602               | 0,00729952                |
| Ozone formation, Terrestrial ecosystems | kg NO <sub>x</sub> eq   | 0,08138323 | 0            | 0,03939858   | 0,04012006 | 0,00172091  | -0,01448529 | 0,00153743 | 7,3584E-05  | -0,00613349 | 0,00029733      | 0,00532338               | 0,01353074                |
| Terrestrial acidification               | kg SO <sub>2</sub> eq   | 0,19720612 | 0            | 0,05956962   | 0,06079659 | 0,00293266  | 0,00516602  | 0,00194121 | 0,00013844  | -0,02024954 | 0,0004902       | 0,02201719               | 0,06440373                |
| Freshwater eutrophication               | kg P eq                 | 0,01394644 | 0            | 0,0049798    | 0,00908827 | 4,6026E-05  | -0,00026119 | 0,00020579 | 8,7242E-07  | -0,00073429 | 4,4494E-05      | 0,00118116               | -0,00060449               |
| Marine eutrophication                   | kg N eq                 | 0,00314133 | 0            | 0,0003324    | 0,00083949 | 8,1083E-06  | 0,00208993  | 1,6238E-05 | 5,8317E-08  | -0,00014903 | 4,5578E-06      | 4,9739E-05               | -5,0172E-05               |

|                                        |             |            |            |            |            |            |             |            |            |             |            |             |             |
|----------------------------------------|-------------|------------|------------|------------|------------|------------|-------------|------------|------------|-------------|------------|-------------|-------------|
| <b>Terrestrial ecotoxicity</b>         | kg 1,4-DCB  | 105,874712 | 0,002227   | 85,8253874 | 46,5973439 | 0,19623103 | -21,0757079 | 1,54445717 | 0,08030596 | -21,7877383 | 0,35721114 | 14,7209209  | -0,58592678 |
| <b>Freshwater ecotoxicity</b>          | kg 1,4-DCB  | 1,12532772 | 0,00053465 | 0,57525481 | 0,55279775 | 0,00587889 | -0,04485112 | 0,01614965 | 0,00032651 | -0,08561306 | 0,0033932  | 0,12412523  | -0,02266879 |
| <b>Marine ecotoxicity</b>              | kg 1,4-DCB  | 1,55418783 | 1,9125E-05 | 0,79654646 | 0,775593   | 0,00971199 | -0,07198541 | 0,02296879 | 0,00046658 | -0,13257846 | 0,00482422 | 0,17919777  | -0,03057623 |
| <b>Human carcinogenic toxicity</b>     | kg 1,4-DCB  | 1,3118754  | 0,000102   | 0,53562713 | 0,75878796 | 0,01252221 | 0,00490478  | 0,0179164  | 0,0002262  | -0,08753946 | 0,00380803 | 0,11108903  | -0,04556888 |
| <b>Human non-carcinogenic toxicity</b> | kg 1,4-DCB  | 28,1797642 | 0          | 13,7388335 | 15,828467  | 0,14365521 | -3,17541545 | 0,51036481 | 0,0037539  | -2,90836879 | 0,1086398  | 4,3641388   | -0,43430463 |
| <b>Land use</b>                        | m2a crop eq | 5,69314884 | 0,06424    | 0,37636896 | 0,32626061 | 0,00181981 | 4,74071968  | 0,00806689 | 5,7504E-05 | -0,04188428 | 0,00368966 | 0,19681913  | 0,01699087  |
| <b>Mineral resource scarcity</b>       | kg Cu eq    | 0,10879267 | 0          | 0,04588393 | 0,04530041 | 0,00102525 | 0,0109838   | 0,00159843 | 1,5242E-05 | -0,01243858 | 0,00034274 | 0,01624634  | -0,00016489 |
| <b>Fossil resource scarcity</b>        | kg oil eq   | 11,3095687 | 0          | 4,83710162 | 3,96419065 | 1,90109858 | 1,64994862  | 0,12414726 | 0,00807472 | -1,61888285 | 0,04040283 | 0,32941132  | 0,07407599  |
| <b>Water consumption</b>               | m3          | 34,4454749 | 0,46       | 0,24369174 | 0,39784421 | 0,00032659 | 33,5098699  | 0,00914981 | 6,3757E-05 | -0,22562695 | 0,01090143 | -0,00158159 | 0,04083599  |

**Table S7.** Chitosan Production Scenarios' Comparison varying NaOH concentration (*wt.%*30-40-50% NaOH solution)

| <b>Impact Category</b>               | <b>Unit</b>           | <b>Chitosan-30% (Scenario 3)</b> | <b>Chitosan-40% (Scenario 2)</b> | <b>Chitosan-50% (Scenario 1)</b> |
|--------------------------------------|-----------------------|----------------------------------|----------------------------------|----------------------------------|
| <b>Global warming</b>                | kg CO <sub>2</sub> eq | 54,3828894                       | 56,799355                        | 59,2158203                       |
| <b>Stratospheric ozone depletion</b> | kg CFC11 eq           | 3,5131E-05                       | 3,7727E-05                       | 4,0323E-05                       |
| <b>Ionizing radiation</b>            | kBq Co-60 eq          | 1,90386264                       | 2,18464322                       | 2,46542377                       |



|                                                |                          |            |            |            |
|------------------------------------------------|--------------------------|------------|------------|------------|
| <b>Ozone formation, Human health</b>           | kg NOx eq                | 0,06759545 | 0,07370426 | 0,07981306 |
| <b>Fine particulate matter formation</b>       | kg PM2.5 eq              | 0,04962256 | 0,05517869 | 0,06073482 |
| <b>Ozone formation, Terrestrial ecosystems</b> | kg NOx eq                | 0,06904402 | 0,07521362 | 0,08138323 |
| <b>Terrestrial acidification</b>               | kg SO <sub>2</sub> eq    | 0,1785077  | 0,18785691 | 0,19720612 |
| <b>Freshwater eutrophication</b>               | kg P eq                  | 0,01115128 | 0,01254886 | 0,01394644 |
| <b>Marine eutrophication</b>                   | kg N eq                  | 0,00288313 | 0,00301223 | 0,00314133 |
| <b>Terrestrial ecotoxicity</b>                 | kg 1,4-DCB               | 91,5433669 | 98,7090396 | 105,874712 |
| <b>Freshwater ecotoxicity</b>                  | kg 1,4-DCB               | 0,95531084 | 1,04031928 | 1,12532772 |
| <b>Marine ecotoxicity</b>                      | kg 1,4-DCB               | 1,31564868 | 1,43491826 | 1,55418782 |
| <b>Human carcinogenic toxicity</b>             | kg 1,4-DCB               | 1,07850477 | 1,19519009 | 1,3118754  |
| <b>Human non-carcinogenic toxicity</b>         | kg 1,4-DCB               | 23,3116065 | 25,7456854 | 28,1797641 |
| <b>Land use</b>                                | m <sup>2</sup> a crop eq | 5,59280507 | 5,64297696 | 5,69314884 |
| <b>Mineral resource scarcity</b>               | kg Cu eq                 | 0,09486021 | 0,10182644 | 0,10879267 |
| <b>Fossil resource scarcity</b>                | kg oil eq                | 10,0903537 | 10,6999613 | 11,3095687 |
| <b>Water consumption</b>                       | m <sup>3</sup>           | 34,3231151 | 34,384295  | 34,4454749 |

- **Sensitivity Analysis**

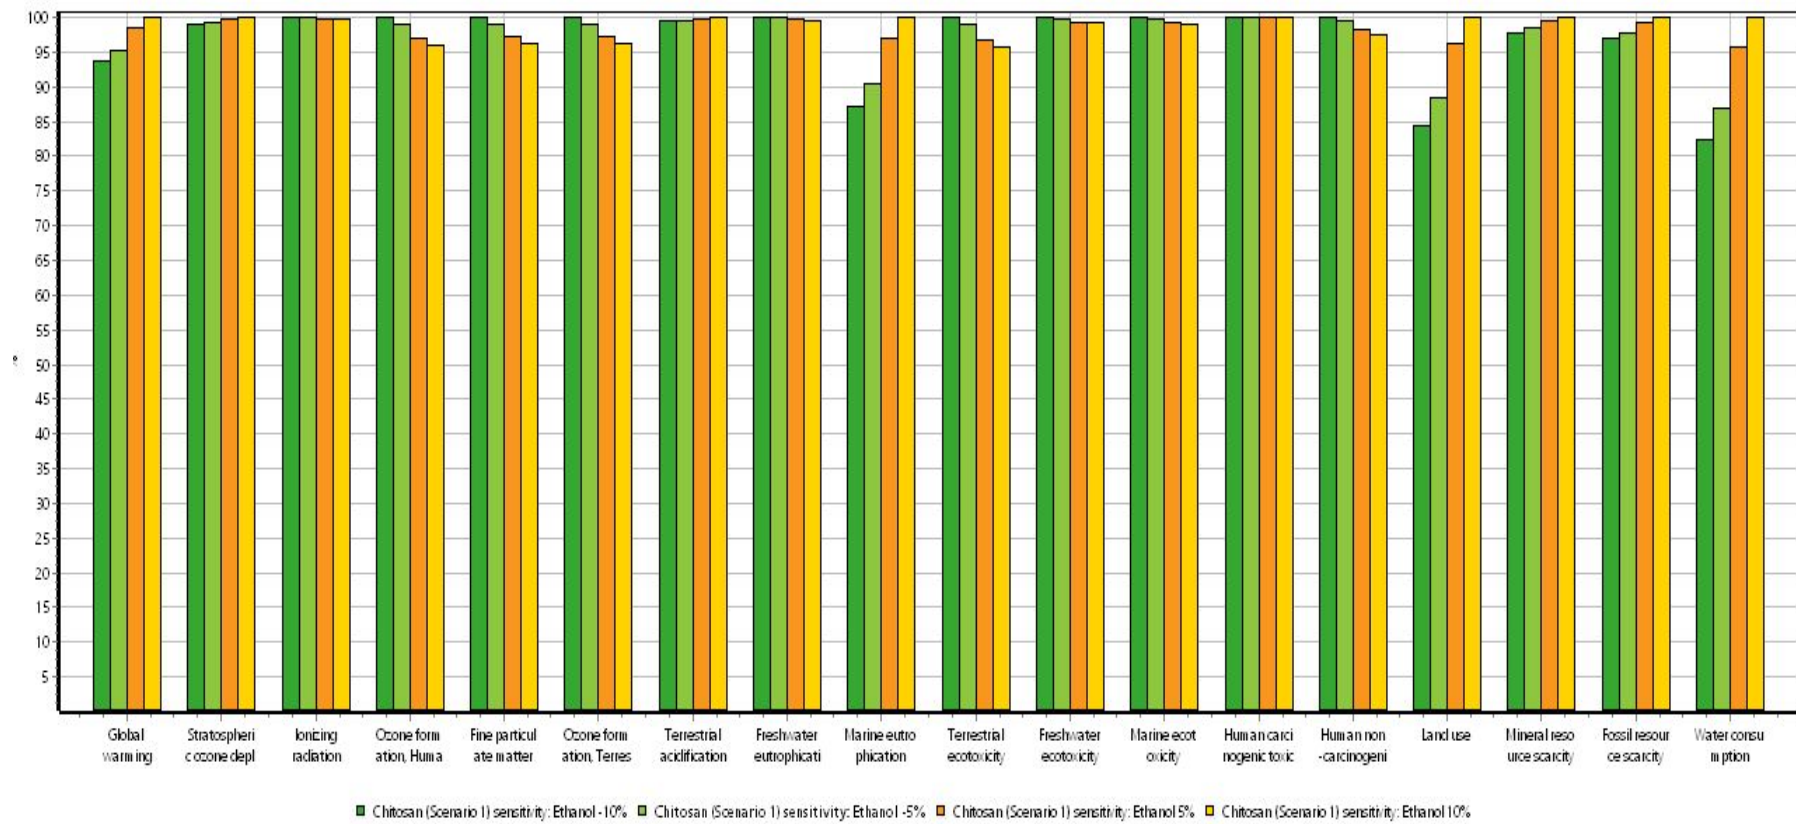

**Figure S1.** Sensitivity analysis results based-on different amounts of ethanol used.

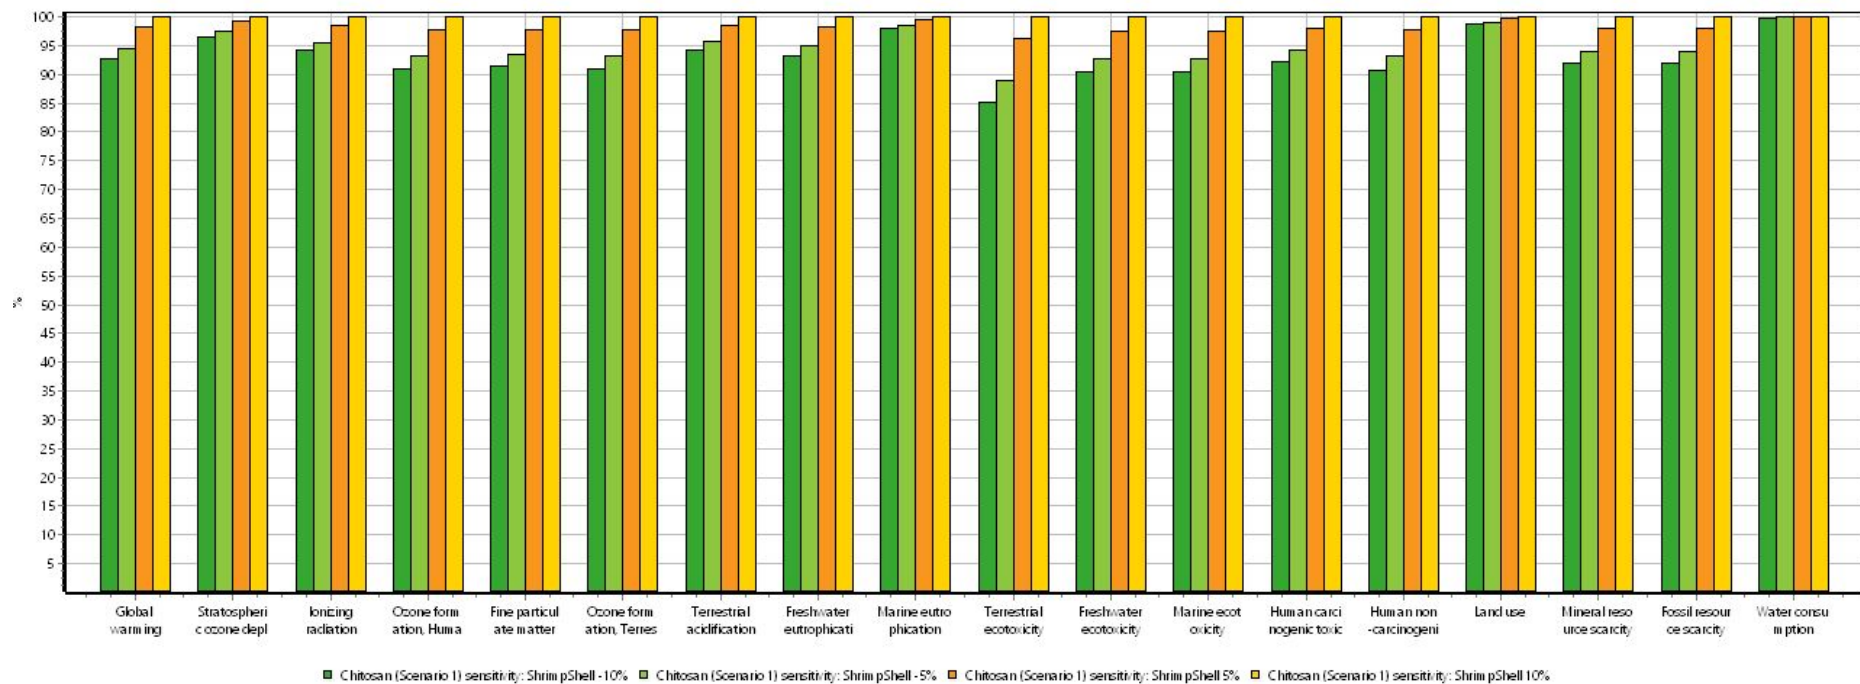

Figure S2. Sensitivity analysis results based-on different amounts of shrimp shell used.

**Table S8.** Normalized Sensitivity Analysis Results by Changing the Method used.

| <b>Impact (RECIPE Midpoint H)</b>              | <b>Unit</b>  | <b>Total</b>   | <b>Impact (ILCD 2011+ Midpoint)</b>       | <b>Unit</b>  | <b>Total</b>        | <b>Impact (TRACI 2.1)</b>    | <b>Unit</b>  | <b>Total</b>   |
|------------------------------------------------|--------------|----------------|-------------------------------------------|--------------|---------------------|------------------------------|--------------|----------------|
| <b>Global warming</b>                          | kg CO2 eq    | 59,2158<br>202 | <b>Climate change</b>                     | kg CO2 eq    | 32,71555<br>12      | <b>Ozone depletion</b>       | kg CFC-11 eq | 1,0727E-<br>05 |
| <b>Stratospheric ozone depletion</b>           | kg CFC11 eq  | 4,0323E-<br>05 | <b>Ozone depletion</b>                    | kg CFC-11 eq | 1,0058E-<br>05      | <b>Global warming</b>        | kg CO2 eq    | 57,4326<br>198 |
| <b>Ionizing radiation</b>                      | kBq Co-60 eq | 2,46542<br>38  | <b>Human toxicity, non-cancer effects</b> | CTUh         | 1,1764E-<br>05      | <b>Smog</b>                  | kg O3 eq     | 2,26831<br>87  |
| <b>Ozone formation, Human health</b>           | kg NOx eq    | 0,07981<br>306 | <b>Human toxicity, cancer effects</b>     | CTUh         | 1,9451E-<br>06      | <b>Acidification</b>         | kg SO2 eq    | 0,22572<br>097 |
| <b>Fine particulate matter formation</b>       | kg PM2.5 eq  | 0,06073<br>482 | <b>Particulate matter</b>                 | kg PM2.5 eq  | -<br>0,018061<br>57 | <b>Eutrophication</b>        | kg N eq      | 0,28803<br>373 |
| <b>Ozone formation, Terrestrial ecosystems</b> | kg NOx eq    | 0,08138<br>323 | <b>Ionizing radiation HH</b>              | kBq U235 eq  | 3,321872<br>67      | <b>Carcinogenics</b>         | CTUh         | 1,9448E-<br>06 |
| <b>Terrestrial acidification</b>               | kg SO2 eq    | 0,19720<br>612 | <b>Ionizing radiation E (interim)</b>     | CTUe         | 3,5176E-<br>05      | <b>Non carcinogenics</b>     | CTUh         | 1,1764E-<br>05 |
| <b>Freshwater eutrophication</b>               | kg P eq      | 0,01394<br>644 | <b>Photochemical ozone formation</b>      | kg NMVOC eq  | 0,101071<br>47      | <b>Respiratory effects</b>   | kg PM2.5 eq  | 0,02724<br>99  |
| <b>Marine eutrophication</b>                   | kg N eq      | 0,00314<br>133 | <b>Acidification</b>                      | molc H+ eq   | 0,296473<br>82      | <b>Ecotoxicity</b>           | CTUe         | 319,326<br>053 |
| <b>Terrestrial ecotoxicity</b>                 | kg 1,4-DCB   | 105,874<br>712 | <b>Terrestrial eutrophication</b>         | molc N eq    | 0,840194<br>83      | <b>Fossil fuel depletion</b> | MJ surplus   | 53,3558<br>104 |
| <b>Freshwater ecotoxicity</b>                  | kg 1,4-DCB   | 1,12532<br>772 | <b>Freshwater eutrophication</b>          | kg P eq      | 0,060308<br>2       |                              |              |                |
| <b>Marine ecotoxicity</b>                      | kg 1,4-DCB   | 1,55418<br>783 | <b>Marine eutrophication</b>              | kg N eq      | 0,488155<br>33      |                              |              |                |
| <b>Human carcinogenic toxicity</b>             | kg 1,4-DCB   | 1,31187<br>54  | <b>Freshwater ecotoxicity</b>             | CTUe         | 320,8066<br>16      |                              |              |                |

|                                        |             |                |                                                     |              |                |  |  |  |
|----------------------------------------|-------------|----------------|-----------------------------------------------------|--------------|----------------|--|--|--|
| <b>Human non-carcinogenic toxicity</b> | kg 1,4-DCB  | 28,1797<br>642 | <b>Land use</b>                                     | kg C deficit | 1449,659<br>55 |  |  |  |
| <b>Land use</b>                        | m2a crop eq | 5,69314<br>884 | <b>Water resource depletion</b>                     | m3 water eq  | 5,311919<br>78 |  |  |  |
| <b>Mineral resource scarcity</b>       | kg Cu eq    | 0,10879<br>267 | <b>Mineral, fossil &amp; ren resource depletion</b> | kg Sb eq     | 0,002556<br>91 |  |  |  |
| <b>Fossil resource scarcity</b>        | kg oil eq   | 11,3095<br>687 |                                                     |              |                |  |  |  |
| <b>Water consumption</b>               | m3          | 34,4454<br>749 |                                                     |              |                |  |  |  |

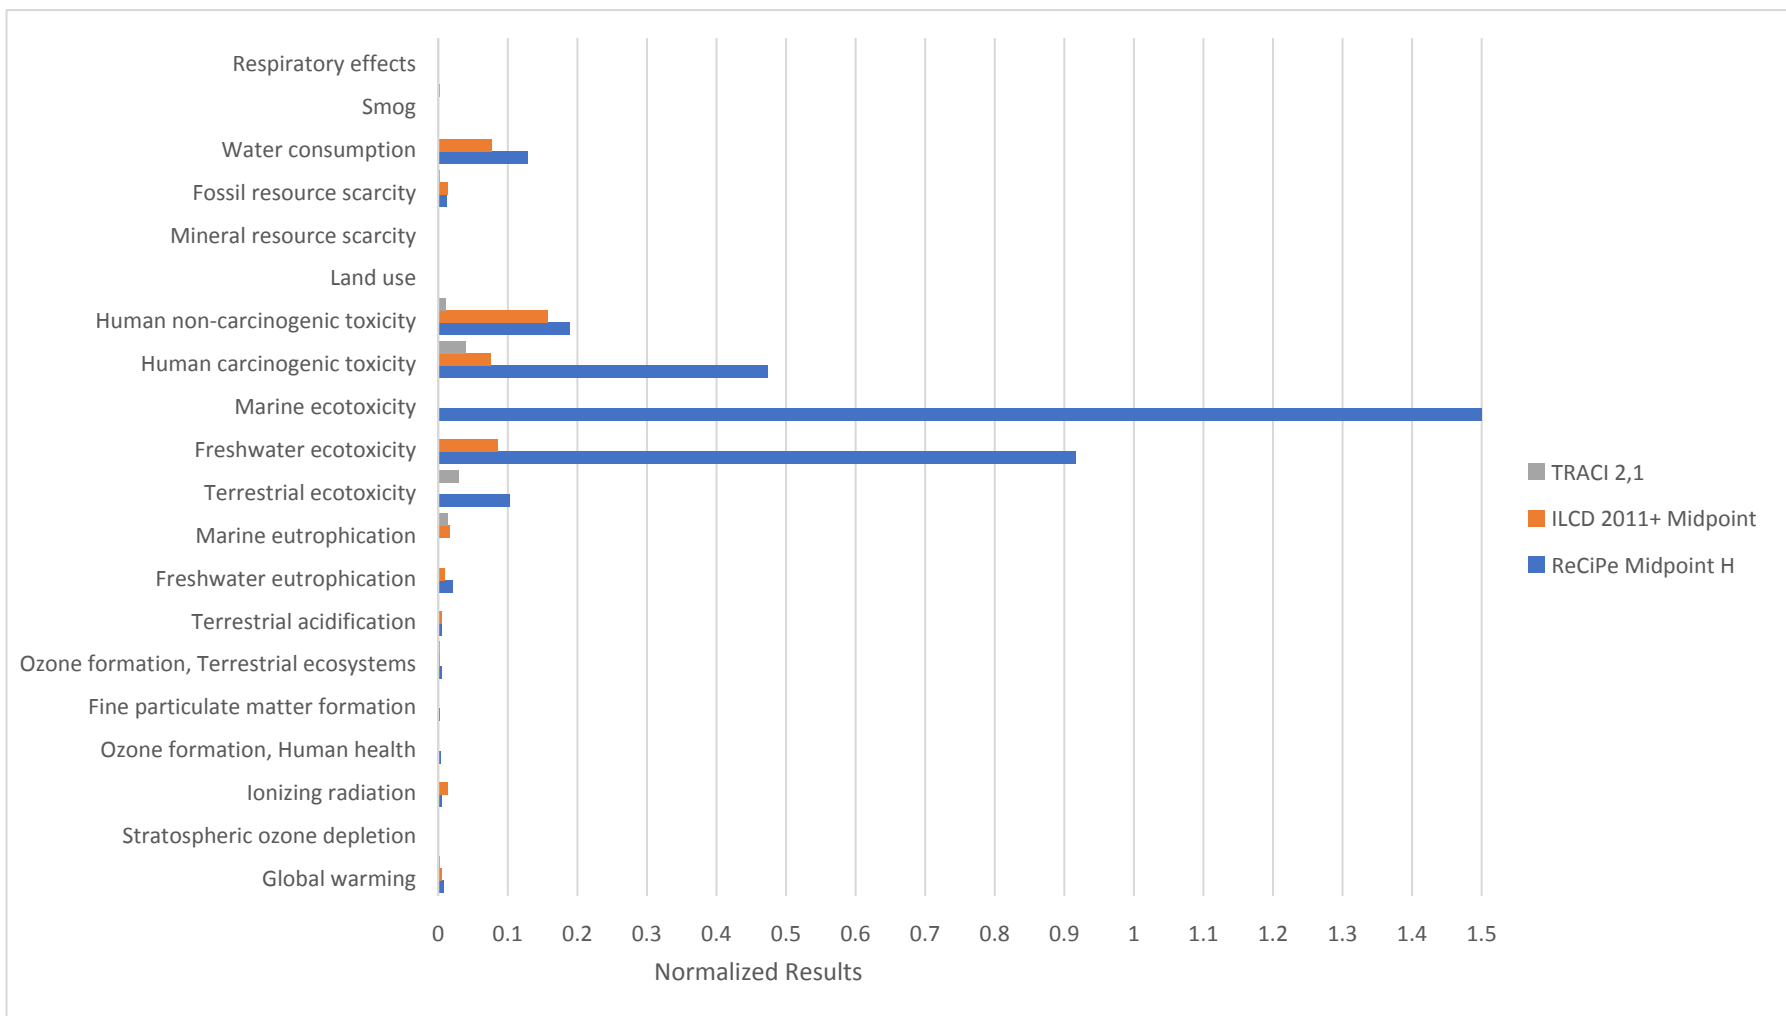

**Figure S3.** Sensitivity analysis of normalized results by changing LCIA method.
